# Supplementary material
Source: PubMed Central journal article supplement (PMC3977196)
Supplement: supp_M113.033423_mcp.M113.033423-1.pdf [file supp_M113.033423_mcp.M113.033423-1.pdf]

## SUPPLEMENTAL MATERIAL

### **Cleavage of E-cadherin and $\beta$ -catenin by calpain affects Wnt signaling and spheroid formation in suspension cultures of human pluripotent stem cells**

Sarah A. Konze<sup>1,2</sup>, Laura van Diepen<sup>3</sup>, Anke Schröder<sup>4</sup>, Ruth Olmer<sup>2,5</sup>, Hanna Möller<sup>1,2</sup>, Andreas Pich<sup>4</sup>, Robert Weißmann<sup>3</sup>, Andreas W. Kuss<sup>3</sup>, Robert Zweigerdt<sup>2,5</sup> & Falk F.R. Buettner<sup>1,2,\*</sup>

<sup>1</sup>Institute for Cellular Chemistry, Hannover Medical School, 30625 Hannover, Germany

<sup>2</sup>REBIRTH Cluster of Excellence, Hannover Medical School, 30625 Hannover, Germany

<sup>3</sup>Institute for Human Genetics & Institute for Genetics & Functional Genomics, Ernst-Moritz-Arndt University, 17475 Greifswald, Germany

<sup>4</sup>Institute of Toxicology, Hannover Medical School, 30625 Hannover, Germany

<sup>5</sup>Leibniz Research Laboratories for Biotechnology and Artificial Organs, Department of Cardiothoracic, Transplantation and Vascular Surgery, Hannover Medical School, 30625 Hannover, Germany

\*To whom correspondence should be addressed: Institute for Cellular Chemistry, Hannover Medical School, Carl-Neuberg-Strasse 1, 30625 Hannover, Germany. Tel.: +49(0)511/532-8245; Fax: +49(0)511/532-8801; E-mail: buettner.falk@mh-hannover.de

Supplementary Figures

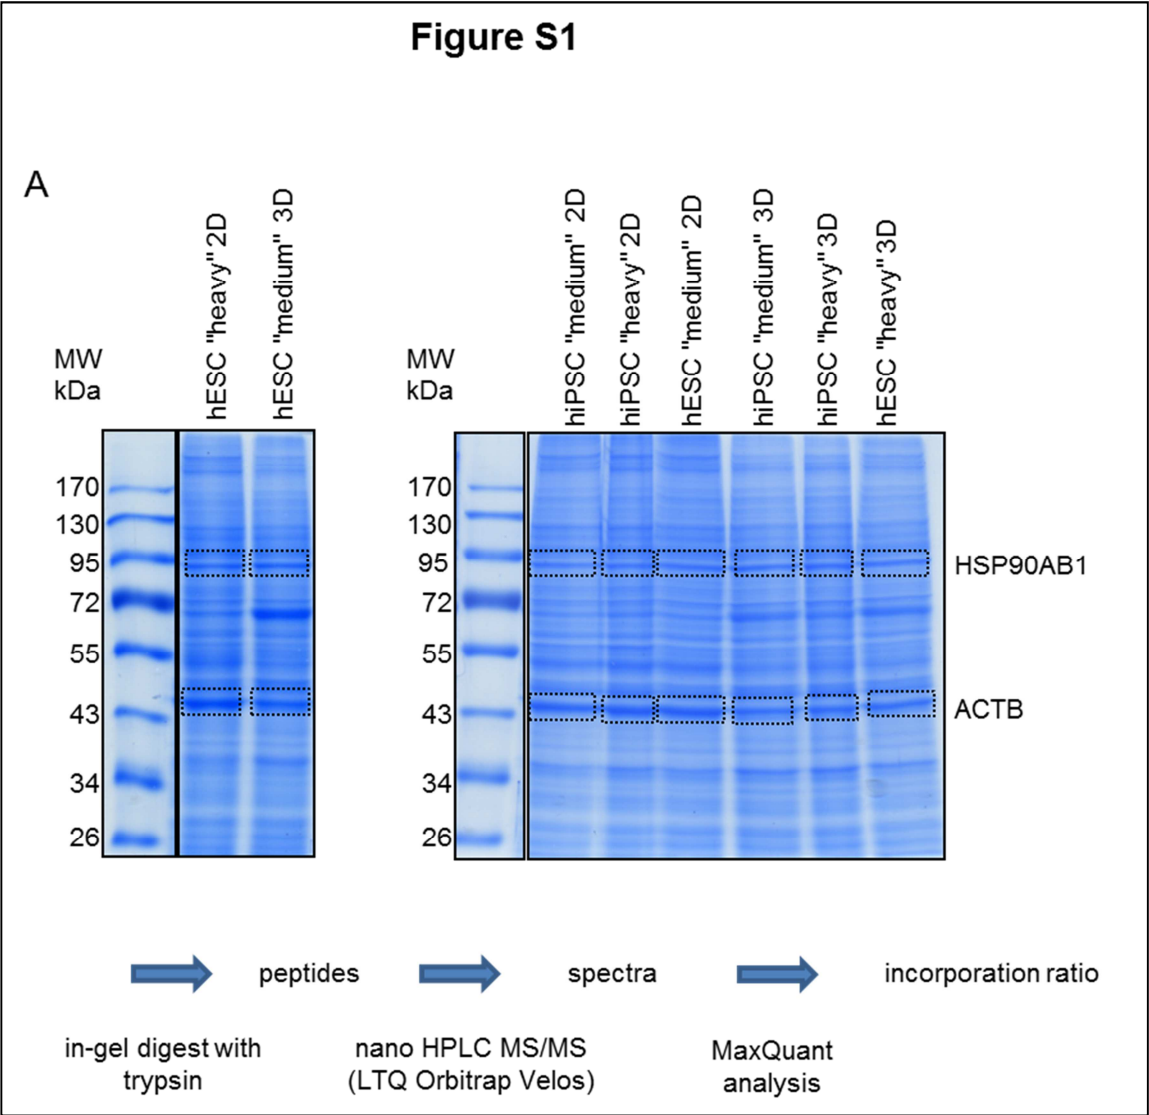

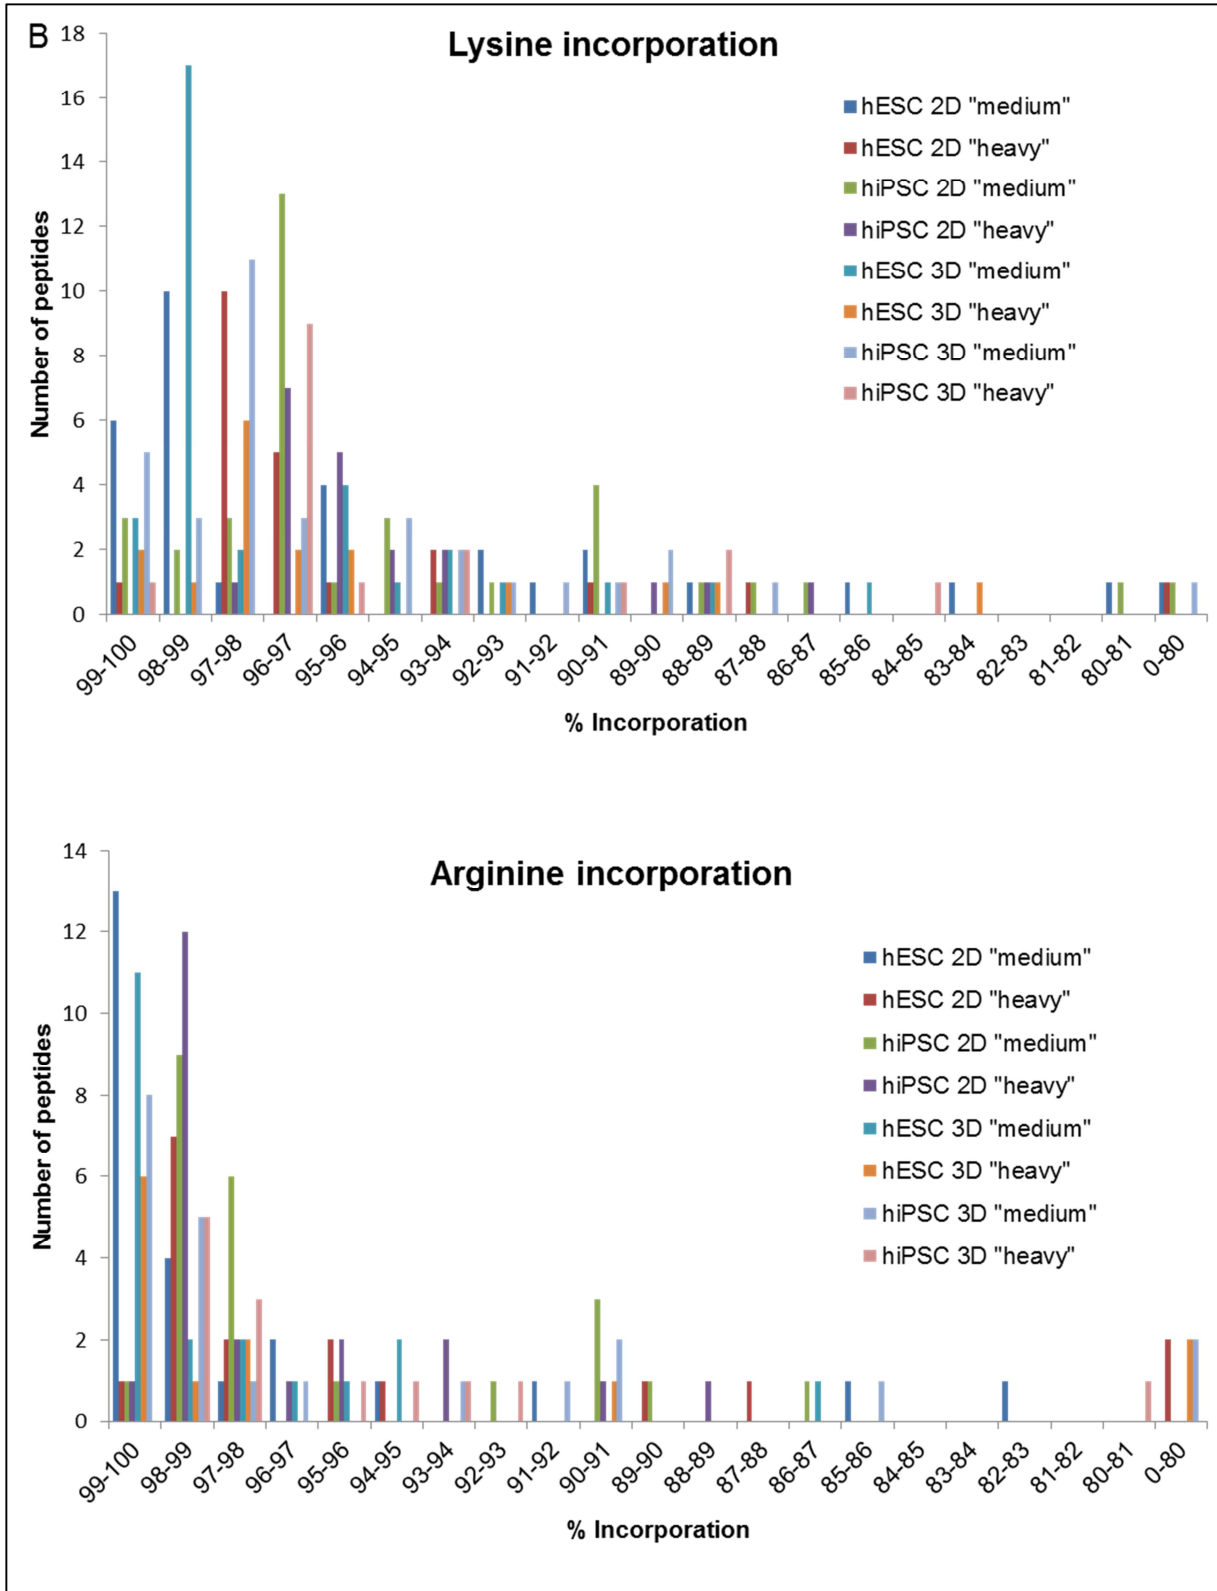

SUPPL. FIG. S1, related to Fig. 2. **Determination of SILAC incorporation efficiencies in hPSCs.** *A*, 10 µg of each “medium” or “heavy” SILAC labeled protein preparation of hESCs and hiPSCs grown under 2D or 3D conditions were separated by SDS-PAGE on 10% gels. Two distinct bands were cut out per lane, pooled and measured by LC-MS/MS. MaxQuant based analysis led to the identification of β-actin (ACTB) and heat-shock protein HSP 90-β (HSP90AB1). *B*, peptide lists were extracted for ACTB and HSP90AB1 from MaxQuant and incorporation efficiencies were calculated from the MaxQuant-derived ratio values for lysine and arginine terminated peptides, respectively. Incorporation efficiency =  $(1-1/(\text{ratio}+1)) \times 100\%$ . Peptides were assigned to categories representing the percentage of label incorporation.

Figure S2

A

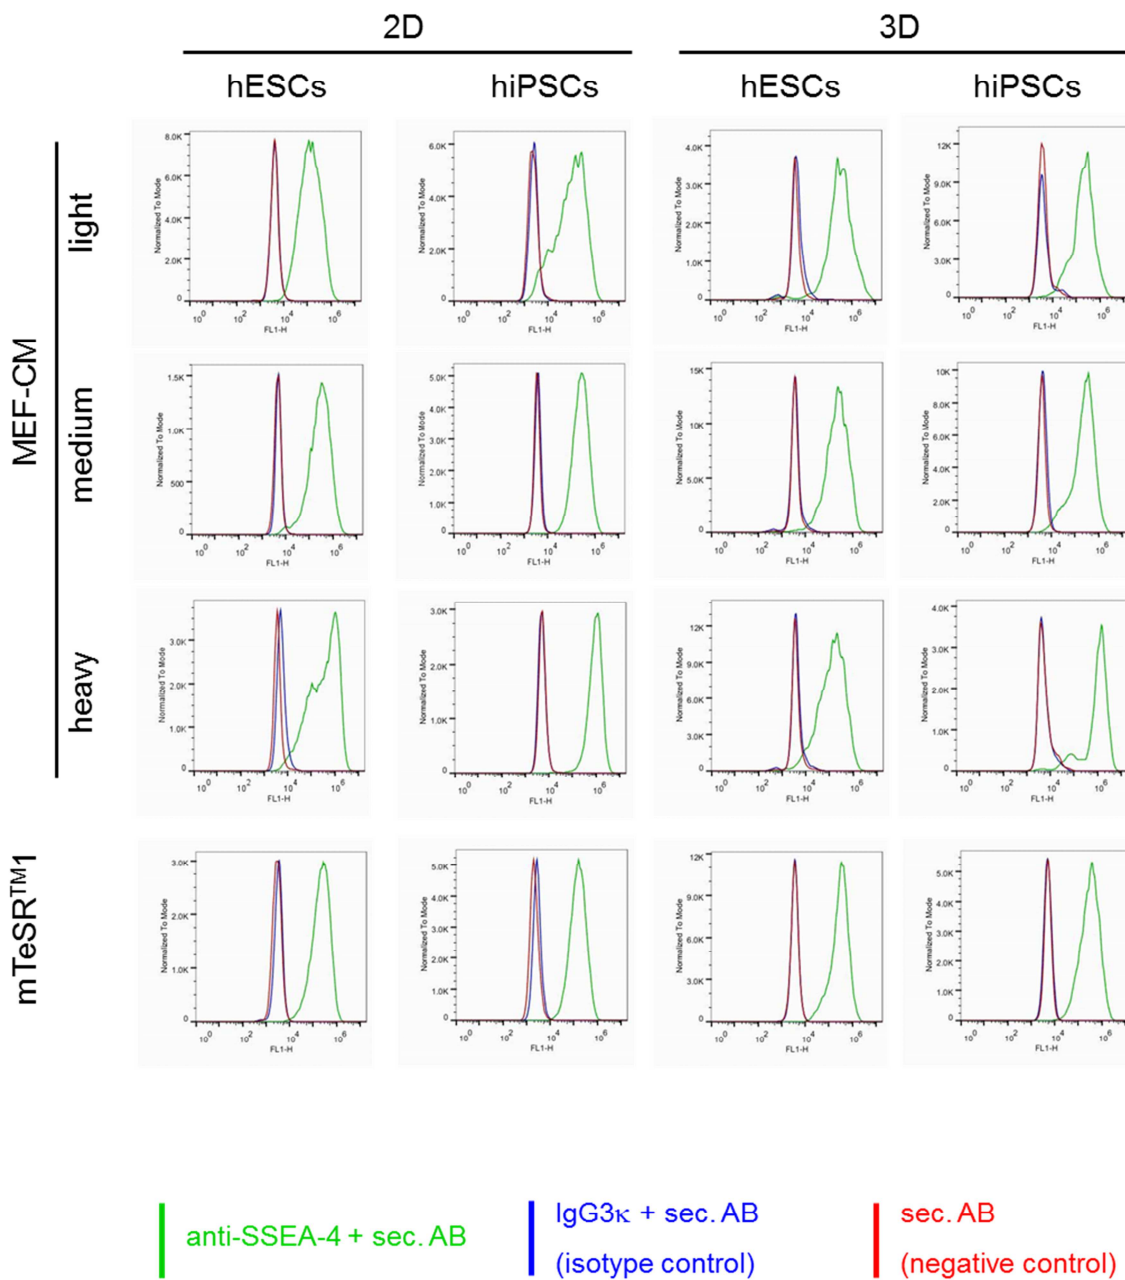

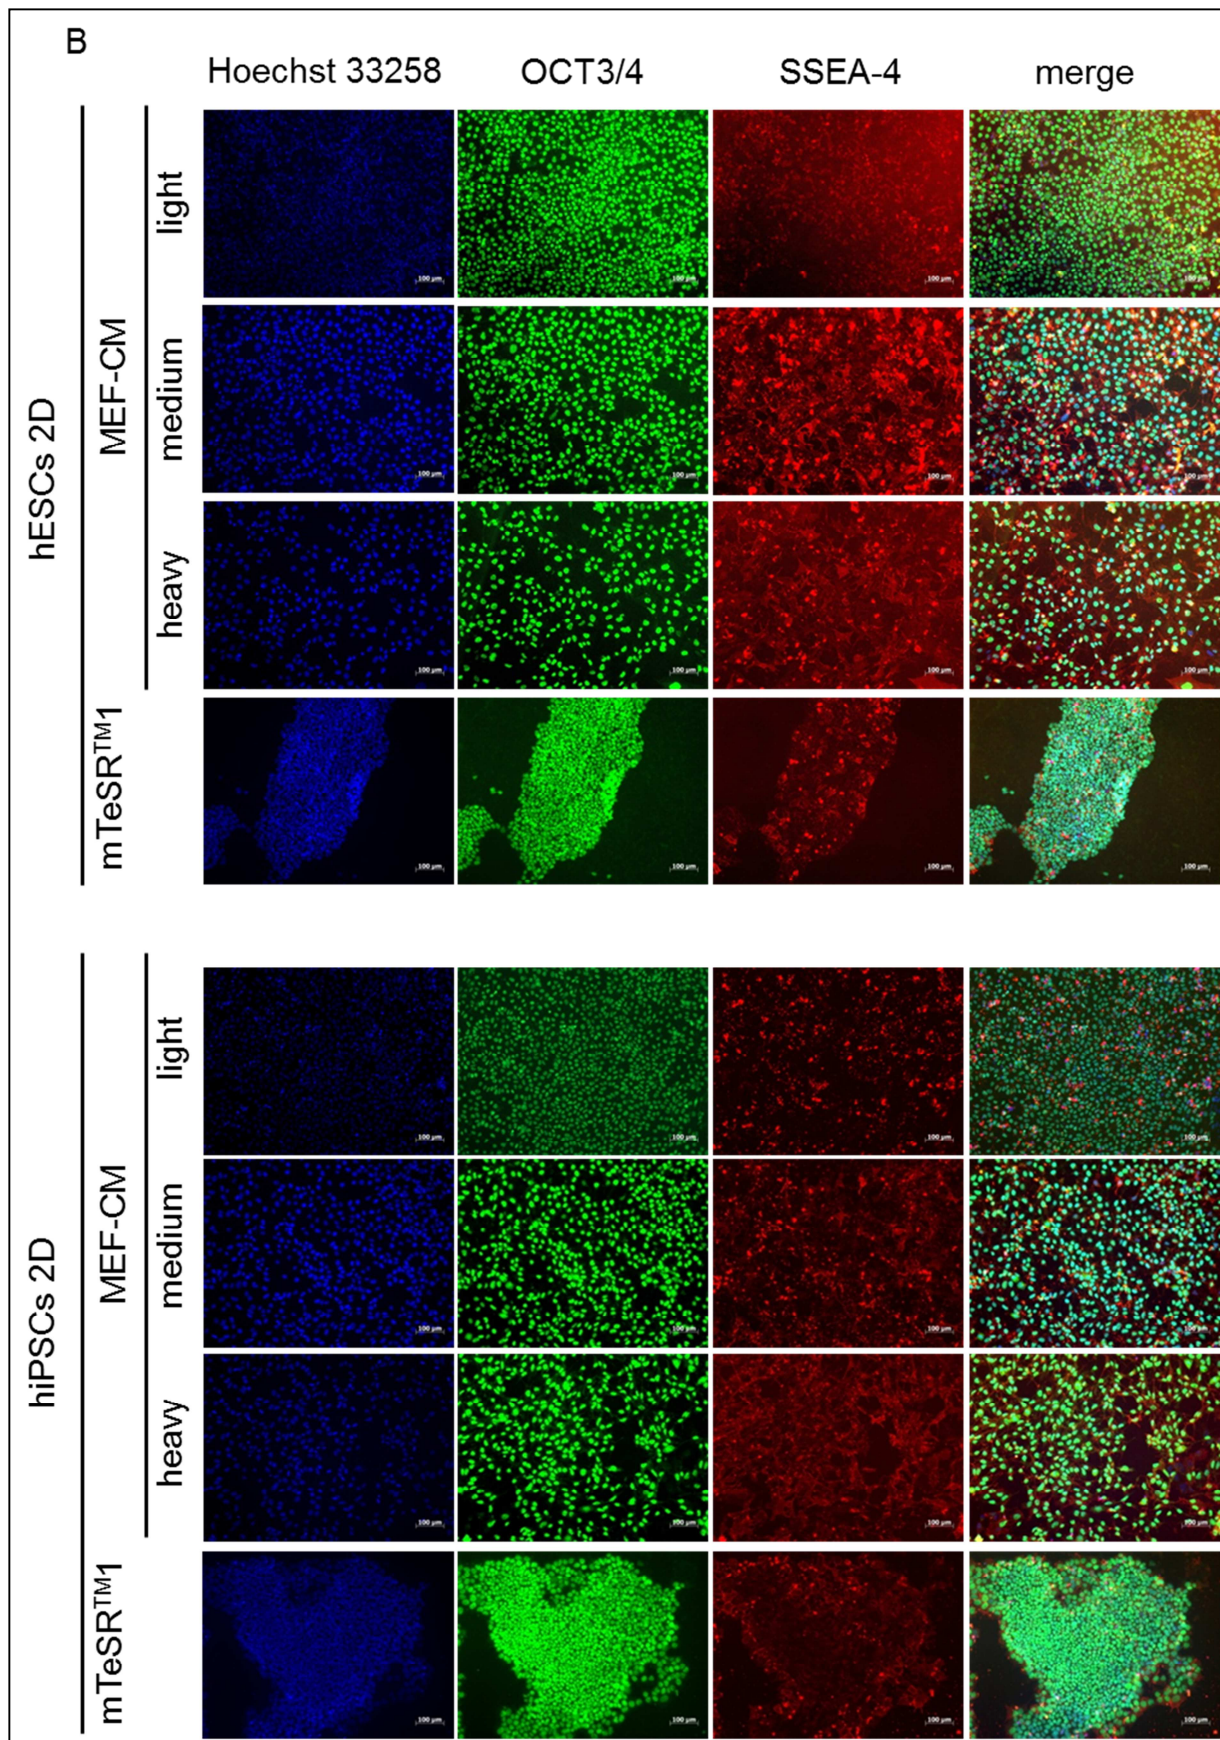

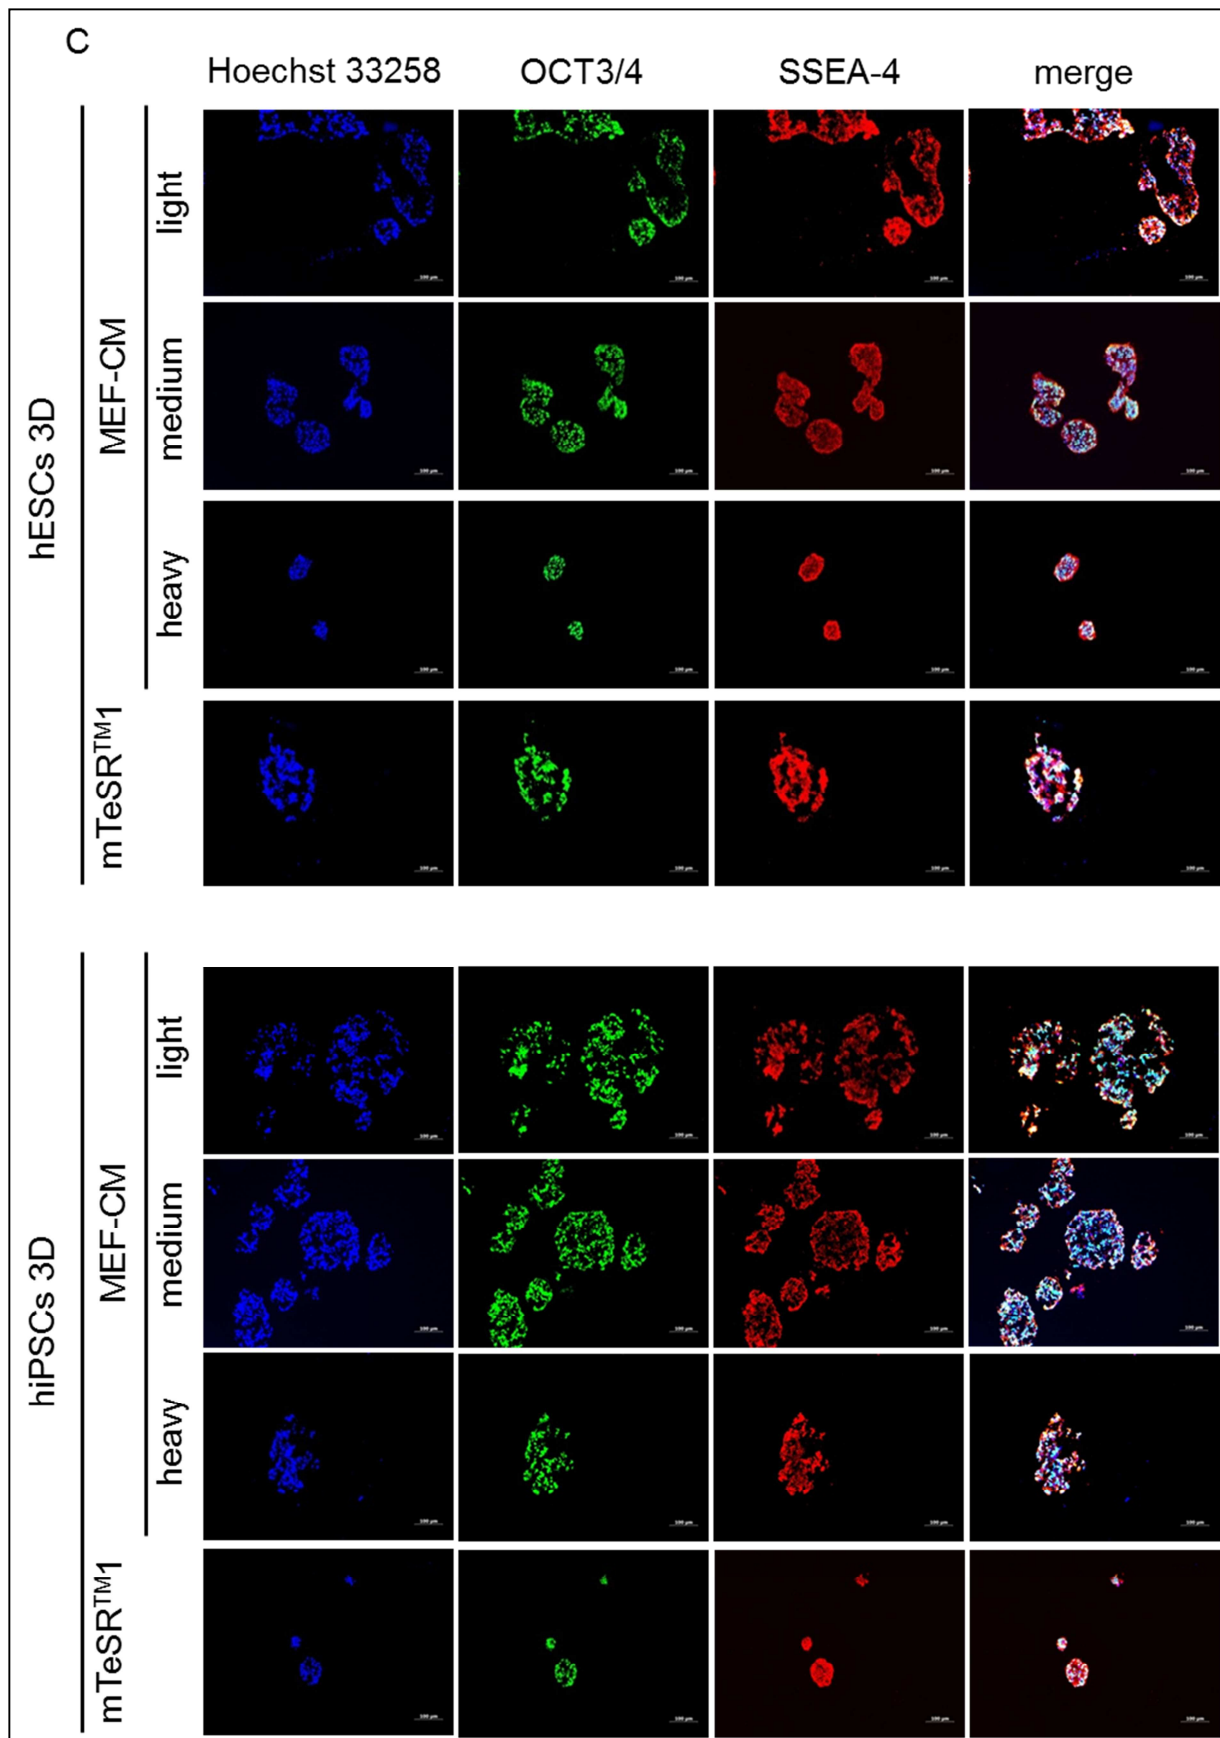

SUPPL. FIG S2 related to Fig. 2. **Analysis of pluripotency markers of hESCs and hiPSCs grown in 2D or 3D by flow cytometry and immunofluorescence microscopy.** *A*, analysis of SSEA-4 expression for hESCs and hiPSCs grown under 2D or 3D conditions by flow cytometry. The analysis was performed for each SILAC labeling condition (MEF-CM “light”, “medium”, and “heavy”) and mTeSR<sup>TM</sup>1 as a positive control. The green line represents the experimental analysis. The isotype control and the negative control are represented by the blue line and the red line, respectively. *B* and *C*, immunofluorescence microscopy for OCT3/4 and SSEA-4 expression in hESCs and hiPSCs grown under 2D (“*B*”) or 3D (“*C*”) conditions for each SILAC labeling condition (MEF-CM “light”, “medium”, and “heavy”) and mTeSR<sup>TM</sup>1 as a positive control. The scale bar represents 100  $\mu$ m. hESCs and hiPSCs in SILAC MEF-CM including the Rho kinase inhibitor Y27632 (RI) grew as a monolayer under 2D conditions whereas hPSCs in mTeSR<sup>TM</sup>1 without RI showed typical colony morphology.



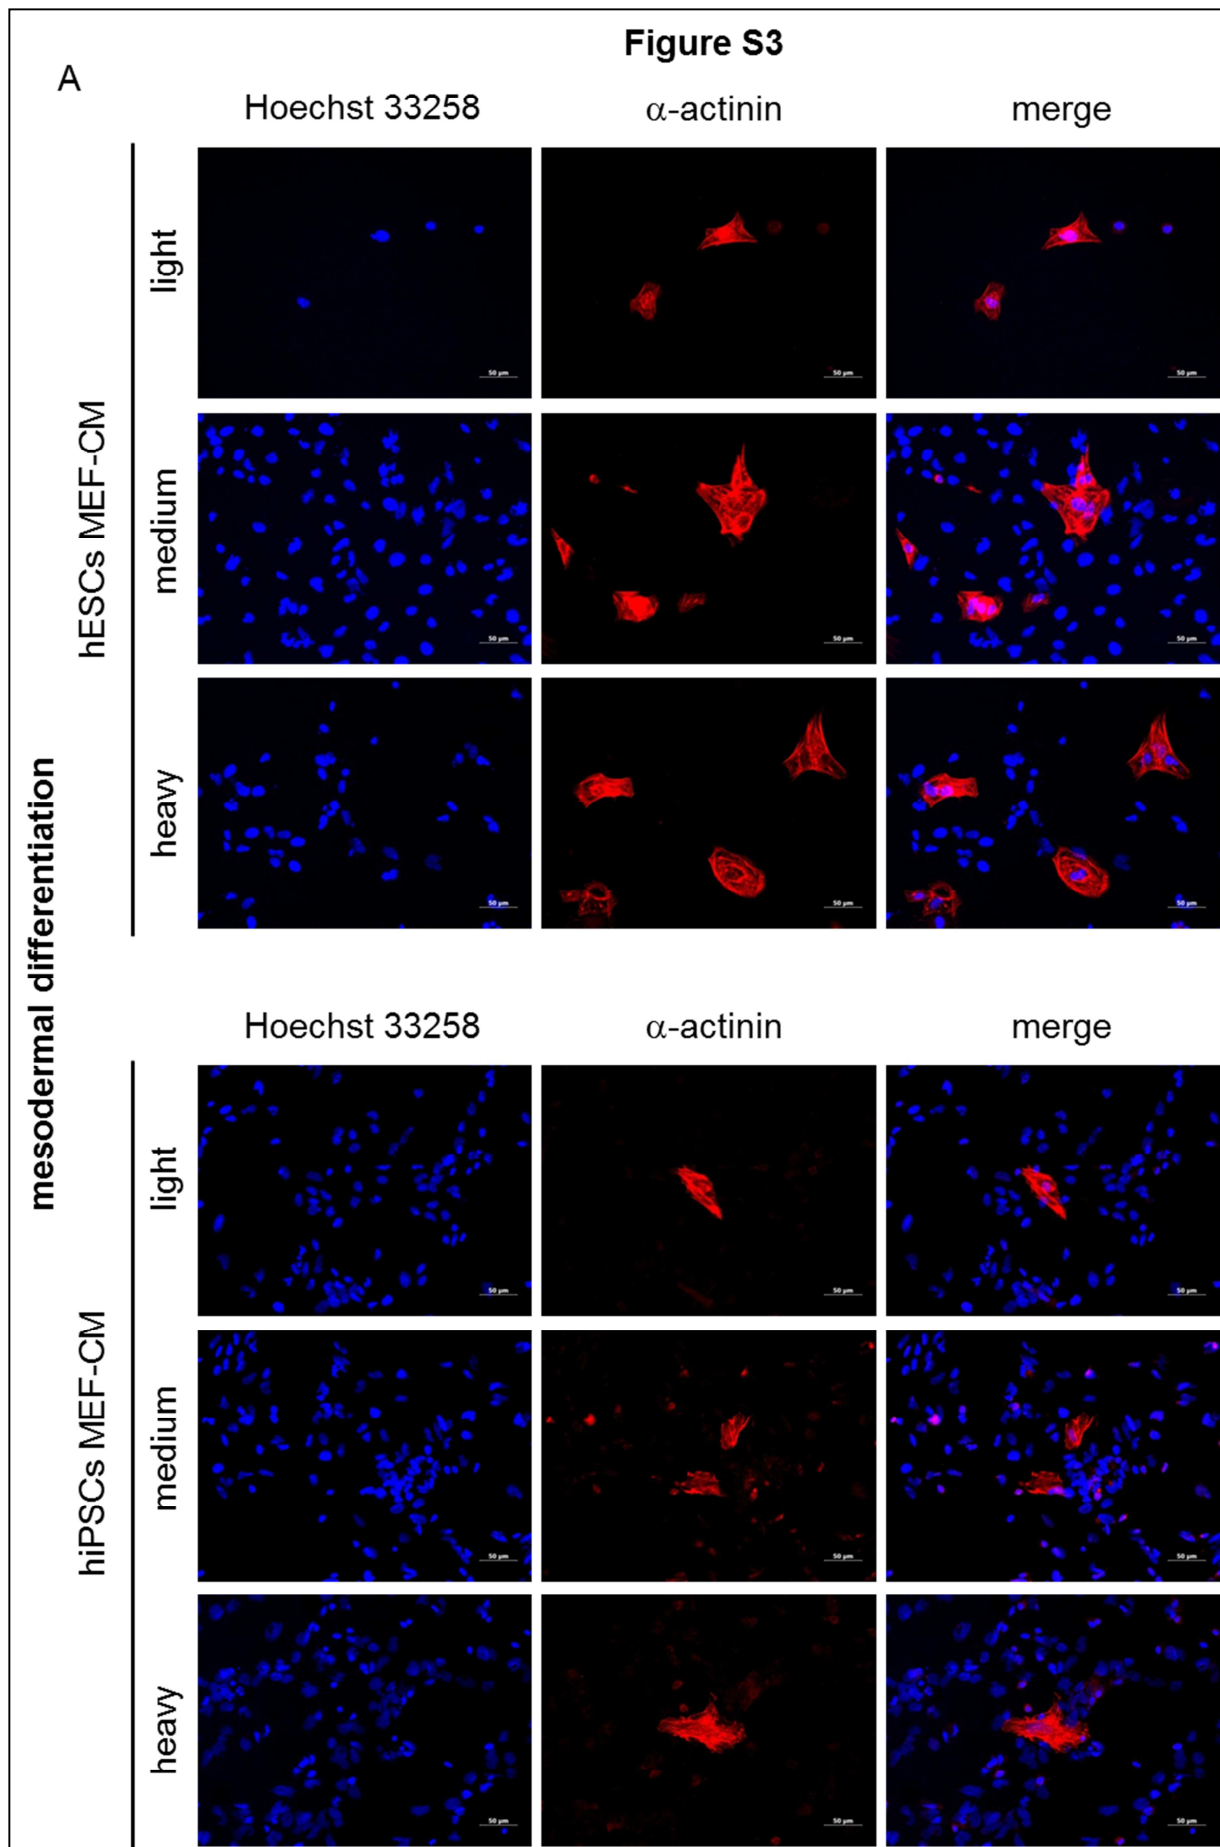

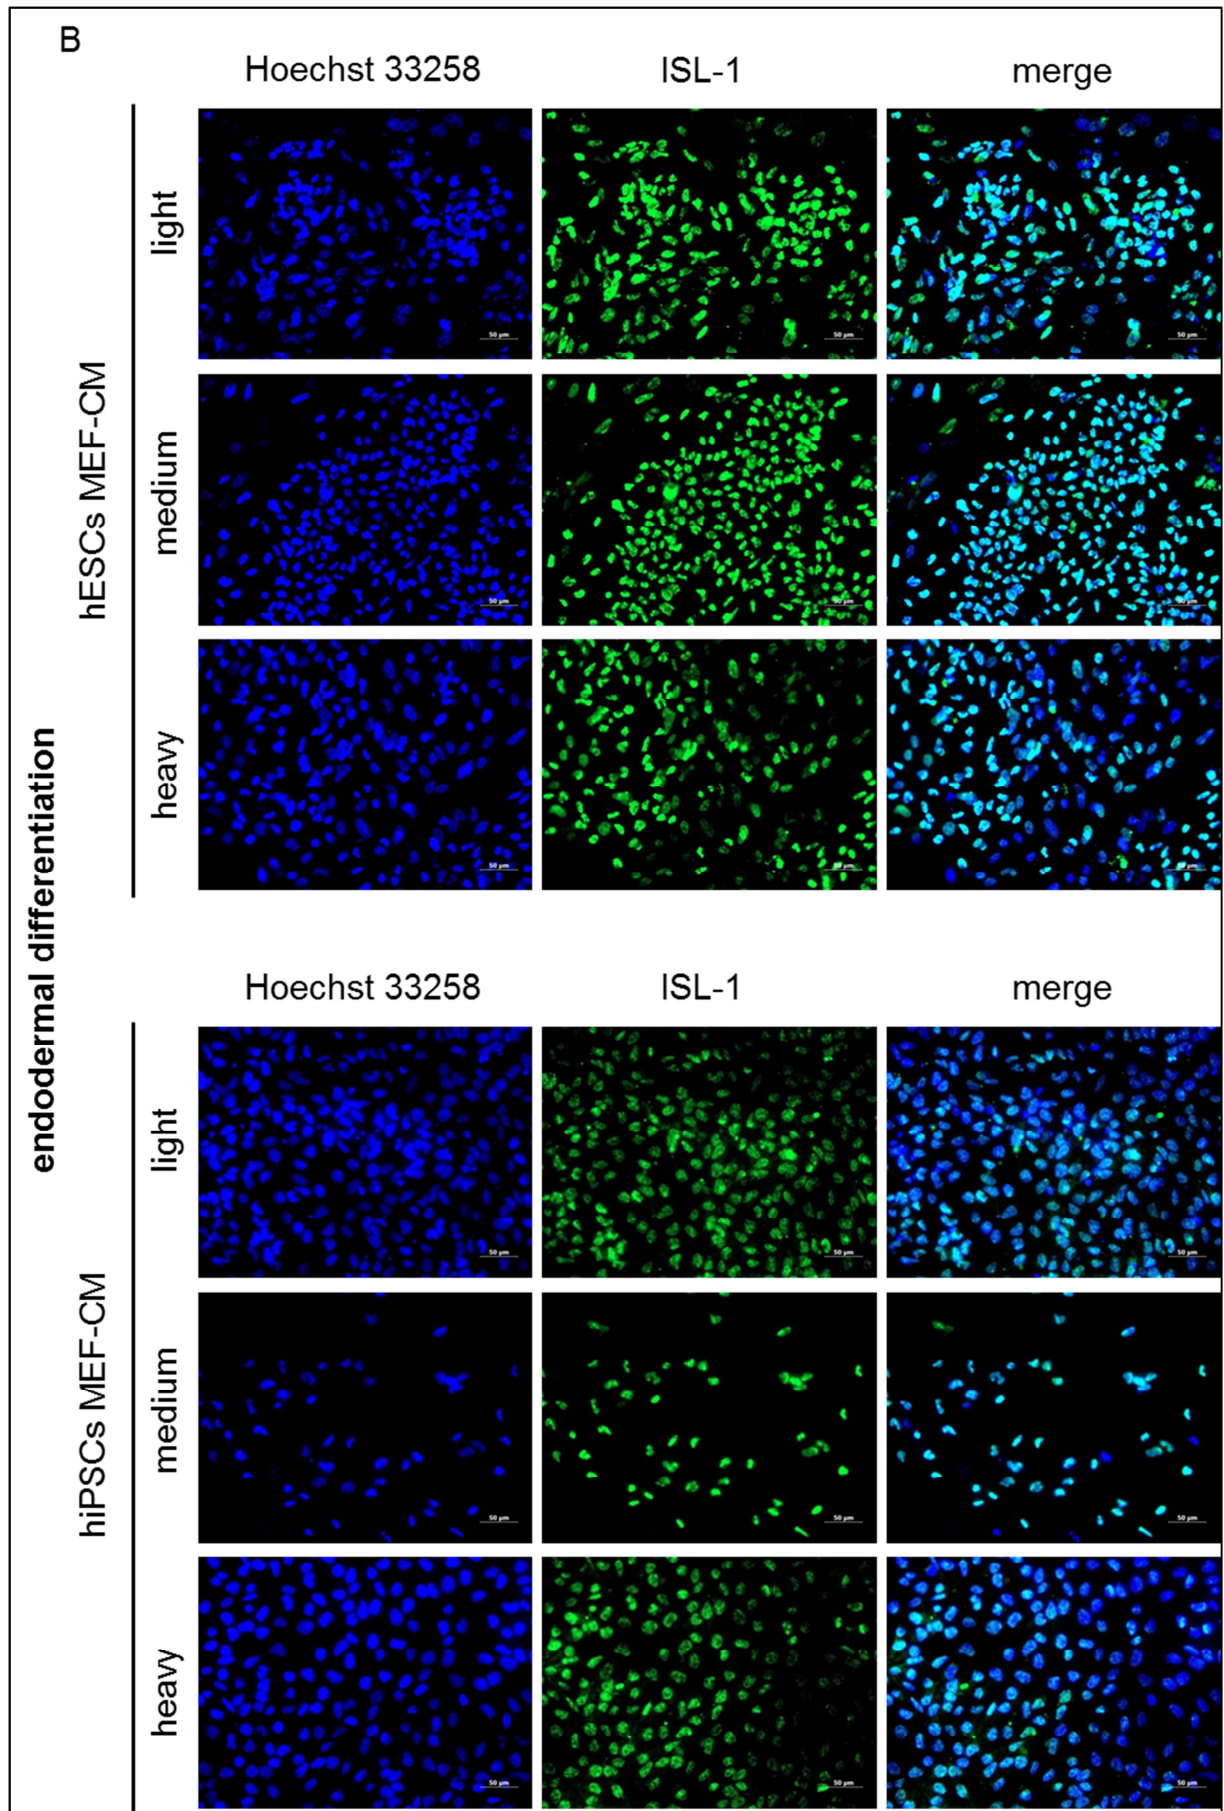

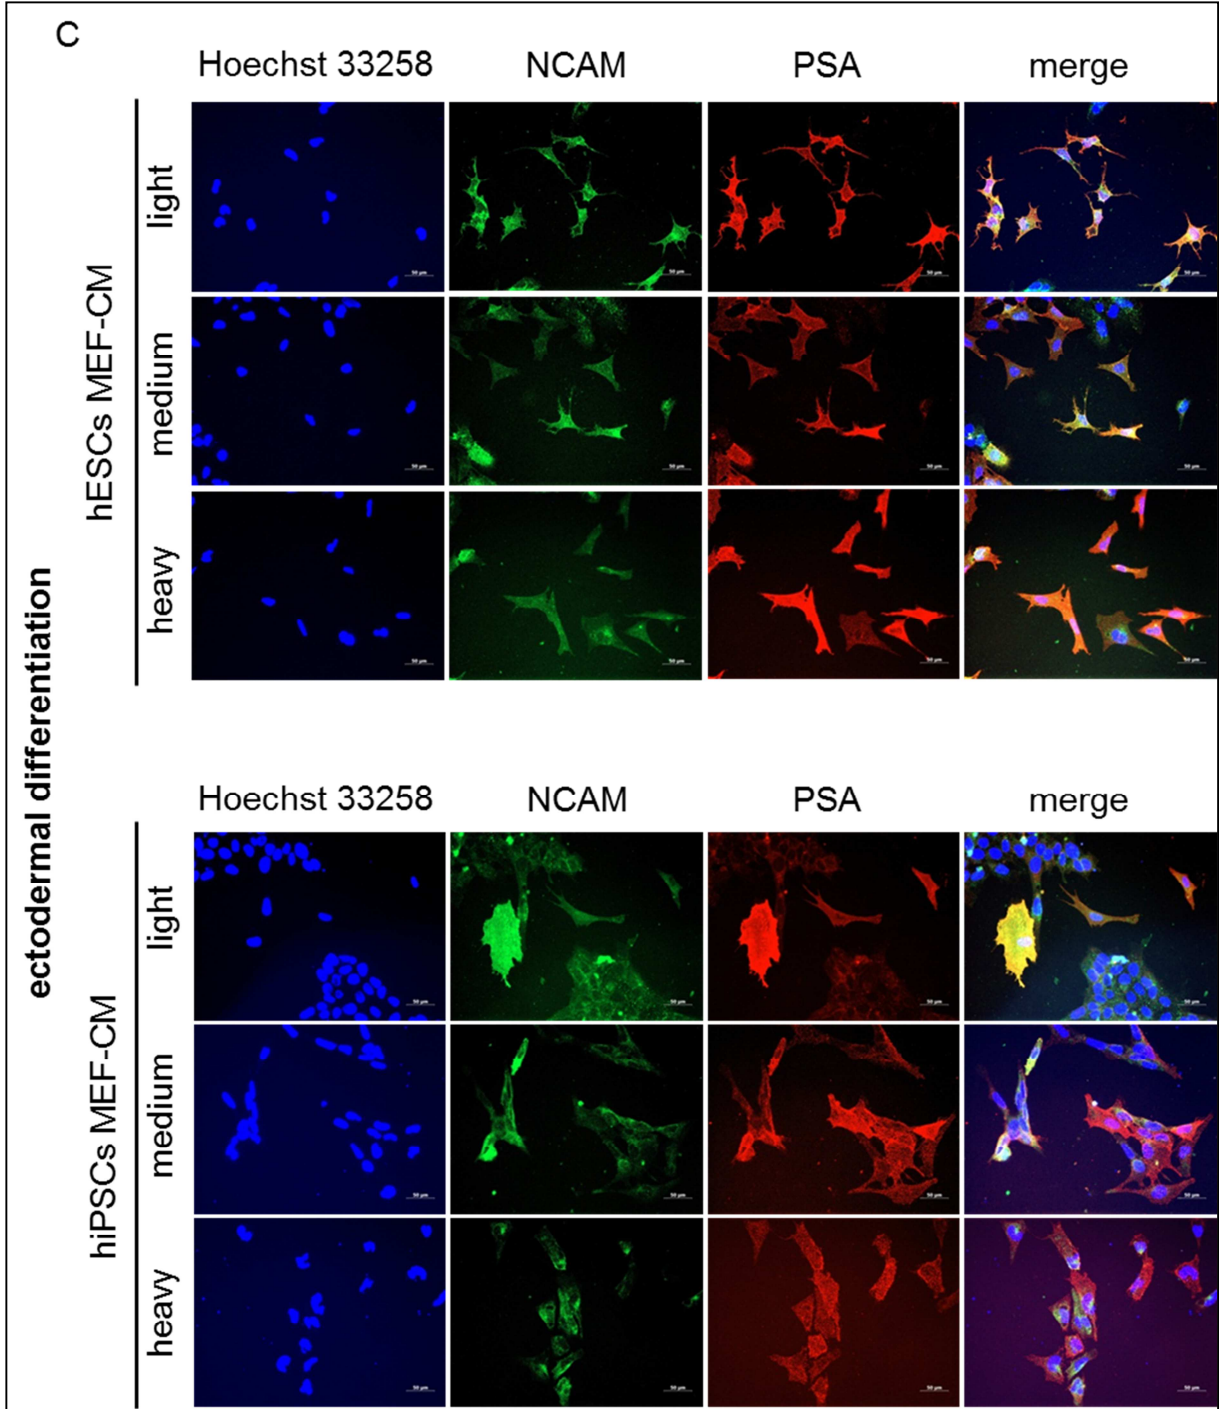

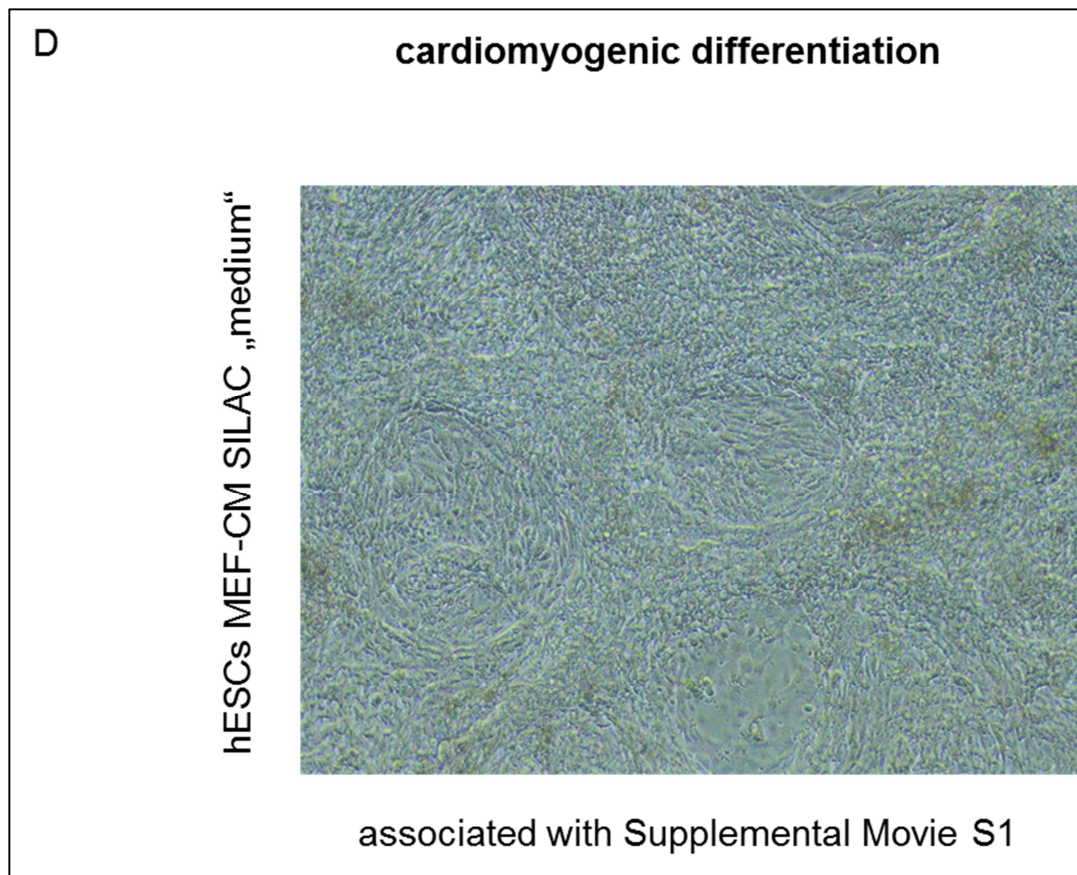

SUPPL. FIG S3 related to Fig. 2. **Differentiation of SILAC-labeled cells into derivatives of all three germ layers.** *A*, immunofluorescence microscopy for expression of the skeletal and cardiac muscle (mesoderm)-specific marker  $\alpha$ -actinin after cardiomyogenic differentiation of SILAC-labeled hESCs and hiPSCs. The analysis was performed for each SILAC labeling condition (MEF-CM “light”, “medium”, and “heavy”). *B*, immunofluorescence microscopy for analysis of expression of the mesodermal/endodermal marker ISL-1 in hESCs and hiPSCs after initiation of endodermal differentiation. *C*, immunofluorescence microscopy for expression of the neuroectodermal markers neural cell adhesion molecule (NCAM) and polysialic acid (PSA). The scale bar represents 50  $\mu$ m (*A-C*). *D*, light microscopy of SILAC labeled hESCs upon cardiomyogenic differentiation at 10-fold magnification. Supplemental Movie S1 (movieS1.mov) is associated with this figure showing autonomous contraction typical for cardiomyocytes. Beating cells do also develop from “light” and “heavy” labeled hESCs as well as from SILAC labeled hiPSCs upon cardiomyogenic differentiation (data not shown).

Figure S4

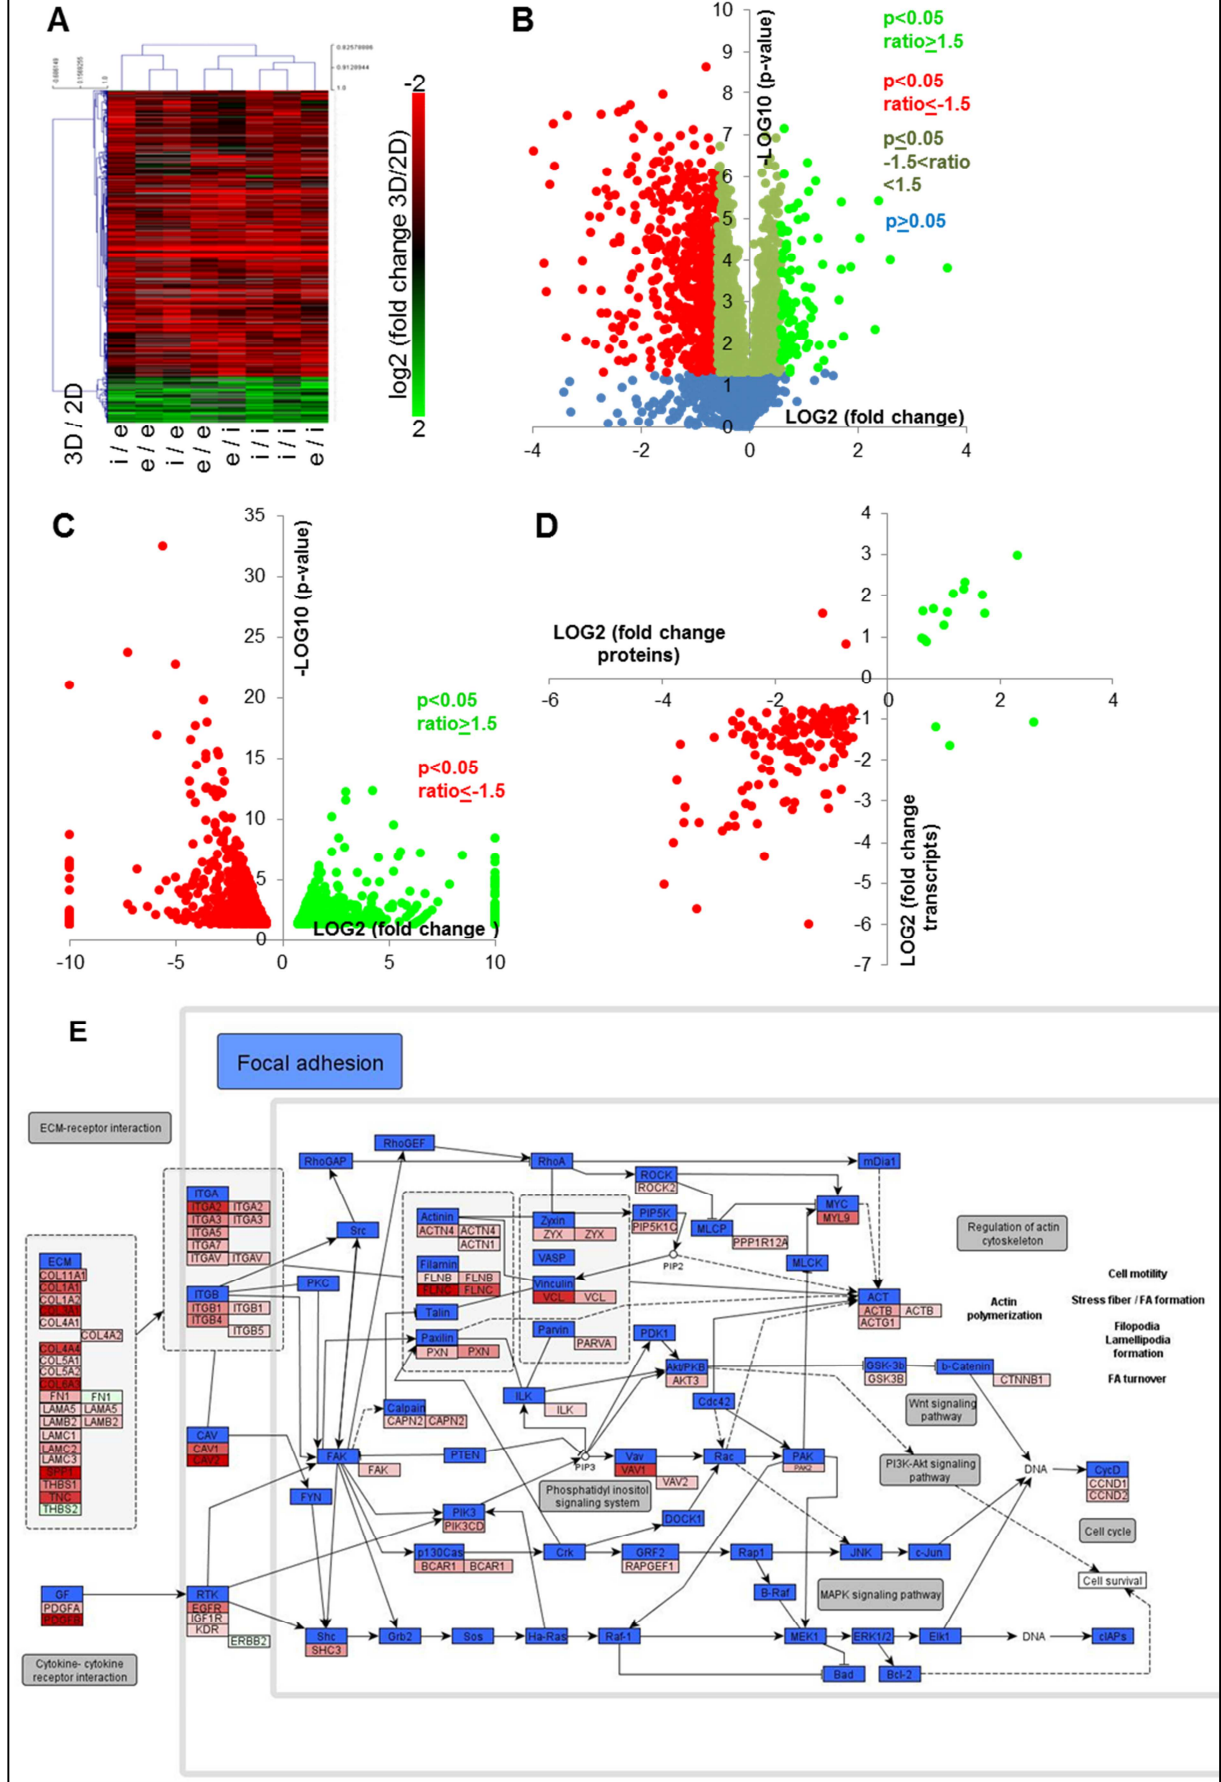

SUPPL. FIG S4 related to Fig. 3 and 4. **Bioinformatic analysis of proteomics and transcriptomics for hESCs and hiPSCs being taken together as hPSCs.** *A*, proteins significantly up- (green) or downregulated (red) comparing 3D vs. 2D culture with hESCs and hiPSCs being analyzed together. From the pooling of the differentially SILAC-labeled samples eight ratios of a 3D sample versus a 2D sample could be directly obtained from the MaxQuant analysis (four intra-cell-line comparisons [hESC 3D vs. hESC 2D or hiPSC 3D vs. hiPSC 2D] and four inter-cell-line comparisons [hESC 3D vs. hiPSC 2D or hiPSC 3D vs. hESC 2D] (Fig. 1)). The heatmap was generated with MeV V4.8.1 (<http://www.tm4.org/mev/>) from the eight 3D vs. 2D ratios for hESCs (e) and hiPSC (i) of 716 proteins that were significantly ( $p < 0.05$ ) regulated above the threshold of 1.5-fold and found in at least four comparisons. Significance and mean ratio were calculated from the eight different comparisons as indicated. Ratios were log<sub>2</sub> transformed and hierarchical clustering was performed using "Pearson Uncentered" as "Distance Metric Selection". *B*, Volcano plot of 3521 different proteins identified by two or more peptides in at least four out of eight comparisons in a combined analysis of hESCs and hiPSCs. *C*, Volcano plot of 1298 different transcripts that were significantly ( $p < 0.05$ ) up- (504) or down- (794) regulated (>1.5-fold) in a combined analysis of hESCs and hiPSCs. *D*, comparison of ratios of the proteomic as well as the transcriptomic approach for proteins or transcripts that were identified significantly ( $p < 0.05$ ) above 1.5-fold by both approaches. *E*, representation of the KEGG pathway "focal adhesion" (blue boxes) including gene expression data (boxes directly below the blue boxes) and protein expression data (boxes shifted to the right below the blue boxes). Upregulation in 3D culture is indicated by greenish boxes, downregulation by reddish with the intensity of the green or red colour depending on the height of regulation. InCroMAP 1.4 software (<http://www.ra.cs.uni-tuebingen.de/software/InCroMAP/>) was used for importation of the KEGG pathway map as well as for importation and visualization of expression data. Final graphical layout was done manually with yEd Graph Editor Software Version 3.10.1 ([http://www.yworks.com/de/products\\_yed\\_about.html](http://www.yworks.com/de/products_yed_about.html)).

Figure S5

A

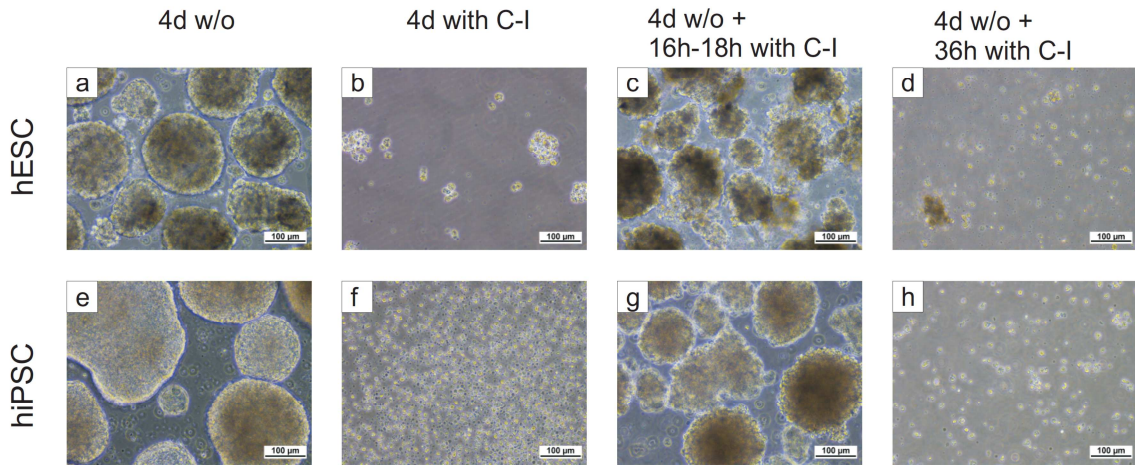

Figure S5

B

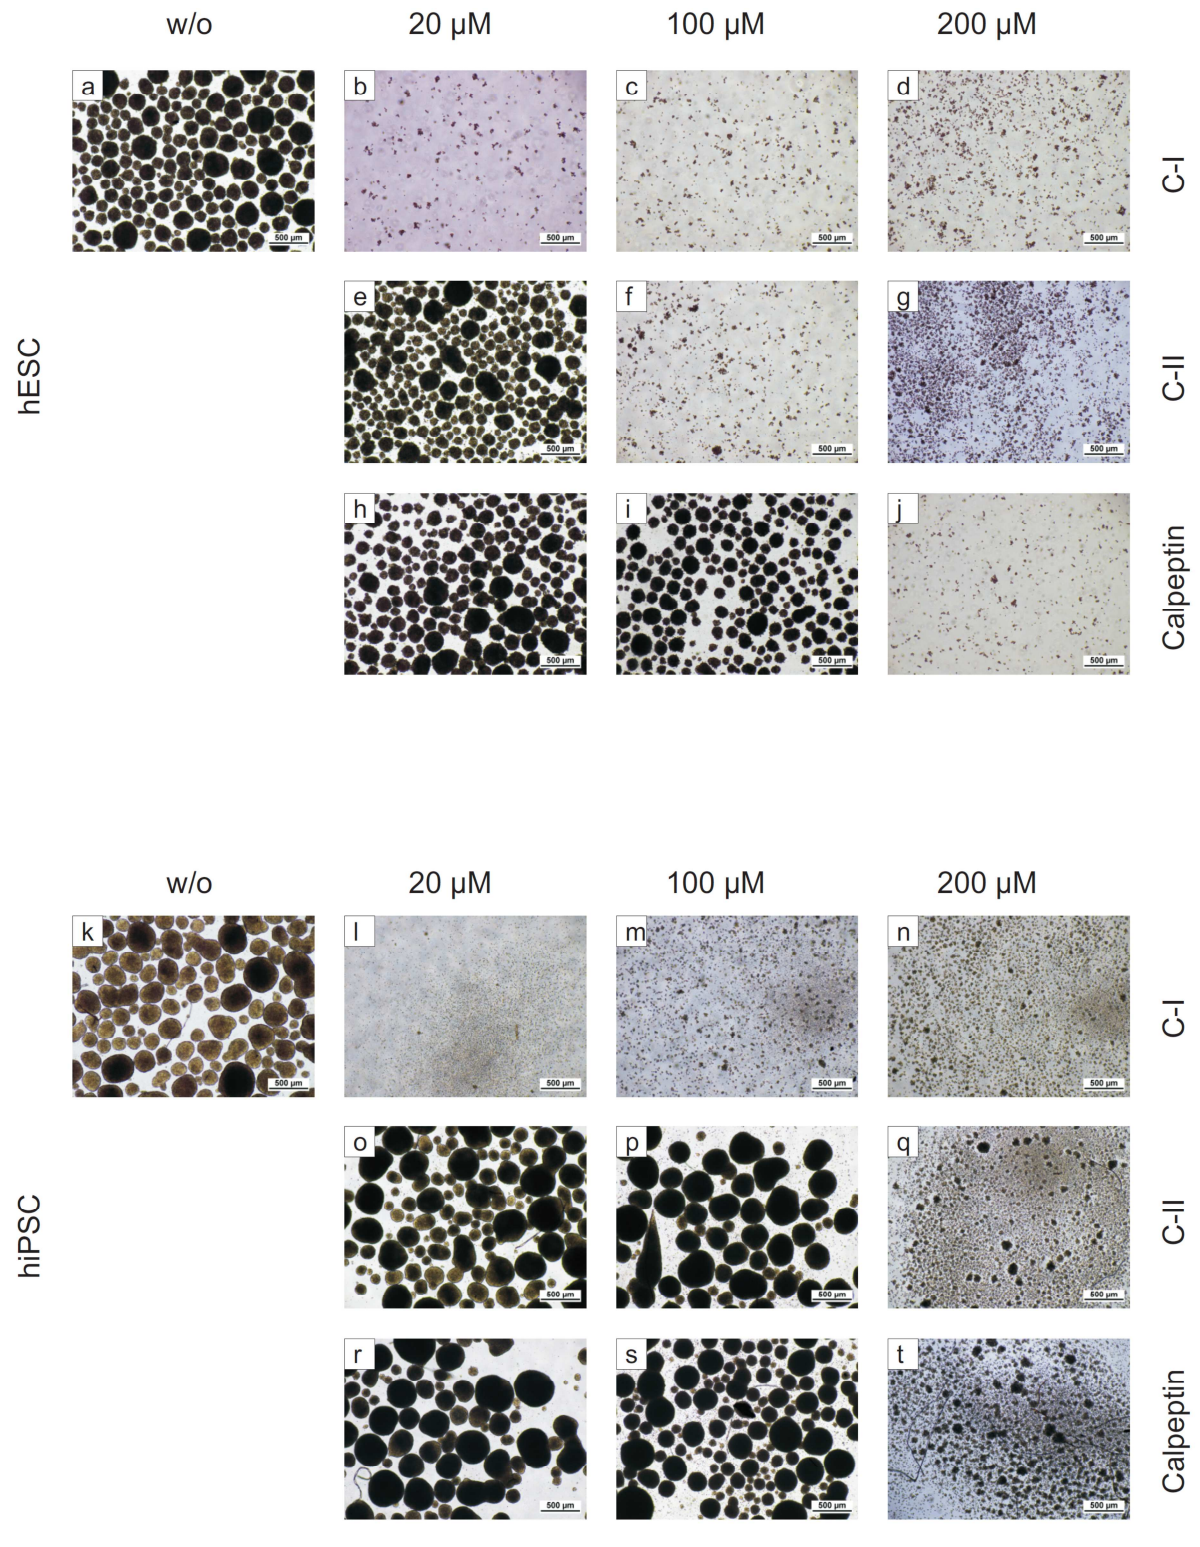



Figure S5

C

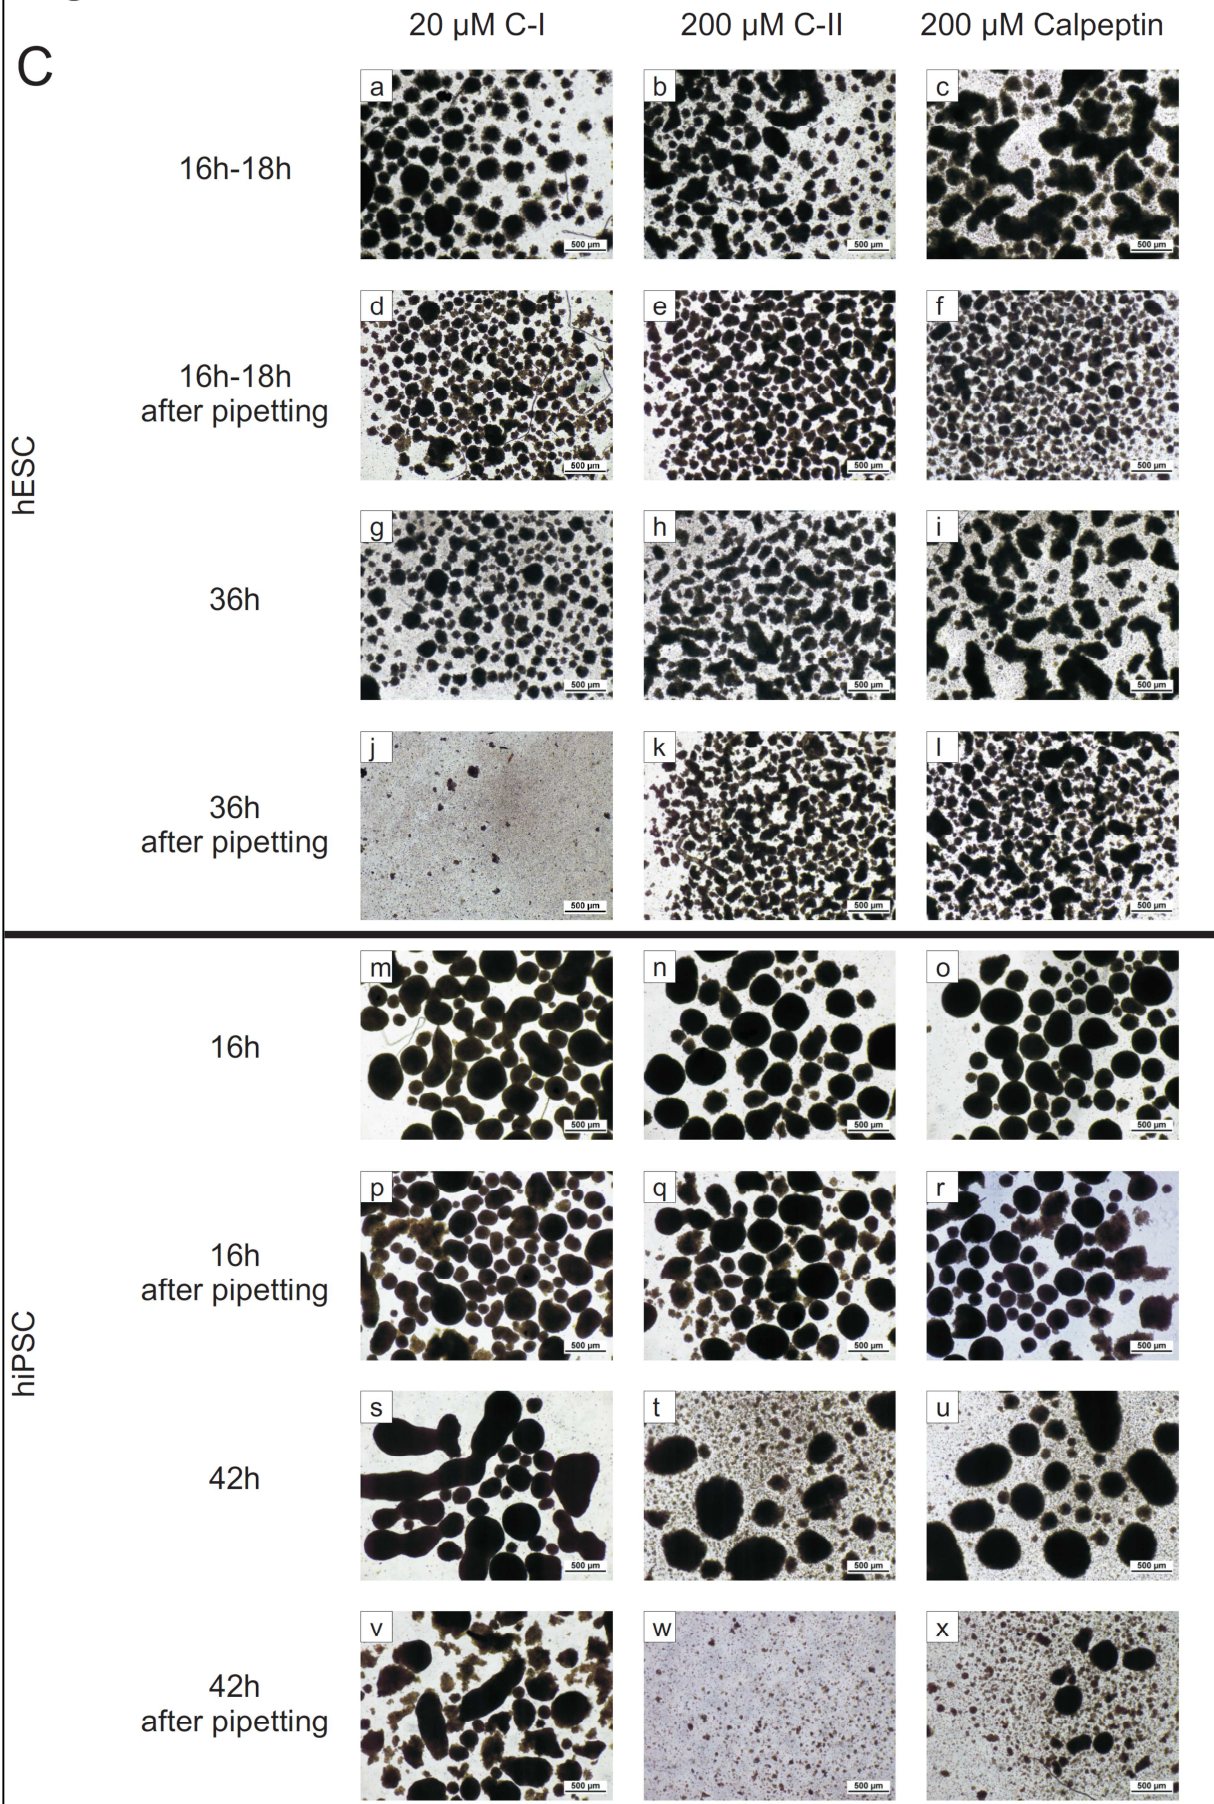

SUPPL. FIG S5, related to FIG. 7. **Effects of calpain inhibitors on spheroid genesis and on pre-formed spheroids.** *A*, this Figure is equivalent to Fig. 7, but pictures were taken at 10-fold magnification. *B*, addition of calpain inhibitors to the inoculum of suspension cultures inhibited spheroid formation. The suspension culture inoculum of hESCs or hiPSCs was supplemented with 20  $\mu$ M, 100  $\mu$ M or 200  $\mu$ M of calpain inhibitor I (C-I), calpain inhibitor II (C-II) or calpeptin. For hESCs 20  $\mu$ M C-I (b), 100  $\mu$ M C-II (f) and 200  $\mu$ M calpeptin (j) were sufficient to completely block spheroid formation. In case of hiPSCs spheroid formation was blocked with 20  $\mu$ M C-I (l), 200  $\mu$ M C-II (q) and 200  $\mu$ M calpeptin (t). 100  $\mu$ M C-II were sufficient to block spheroid formation of hESCs (f) but not of hiPSCs (p). Under standard culture conditions (w/o) spheroids developed as expected and spheroids of hiPSCs were slightly larger than those of hESCs. Solvents had no effect on spheroid formation (data not shown). Images were taken at 4-fold magnification. *C*, pre-formed spheroids could be disassembled by addition of calpain inhibitors to the culture media. 20  $\mu$ M calpain inhibitor I (C-I), 200  $\mu$ M calpain inhibitor II (C-II) or 200  $\mu$ M calpeptin were added to 4d old pre-formed spheroids of hESCs and hiPSCs. Spheroid integrity was assessed after 16h to 18h and after 36h (hESCs) or 42h (hiPSCs). Images were taken at 4-fold magnification. To show loose cell-cell interactions of spheroids incubated with calpain inhibitors, they were pipetted up and down after the indicated times. Pipetting was not sufficient to disrupt spheroids grown in the absence of calpain inhibitors.

Figure S6

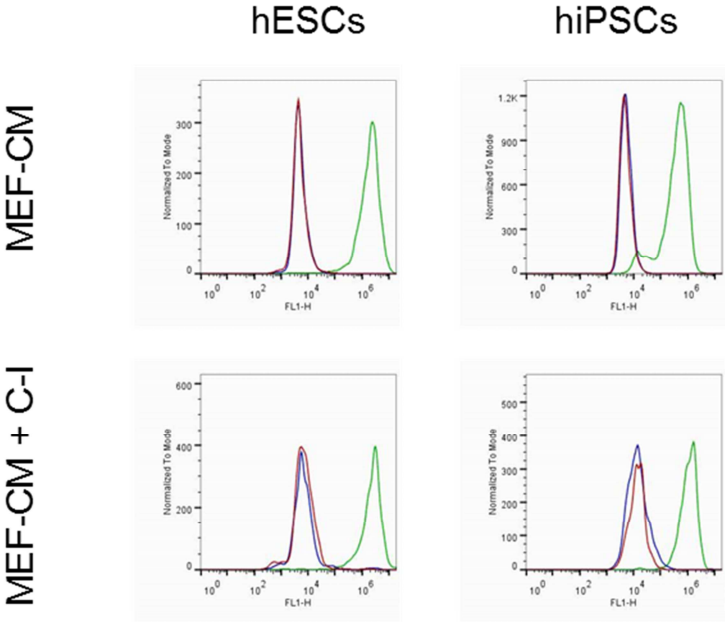

anti-SSEA-4 + sec. AB

IgG3κ + sec. AB  
(isotype control)

sec. AB  
(negative control)

SUPPL. FIG S6 related to Fig. 7. **Analysis of pluripotency of hESCs and hiPSCs treated with calpain inhibitor I.** A, calpain inhibitor I was added to the inoculum of suspension cultures (MEF-CM + C-I). After 24 hours, control cells (MEF-CM) started formation of suspension culture spheroids whereas C-I treated cells remained as single cells. Flow cytometric analysis of hESCs and hiPSCs revealed that expression of SSEA-4 was unchanged in C-I treated cells compared to control. The green line represents the respective hPSC sample signal. The isotype control and the negative control are represented by the blue line and the red line, respectively.

SUPPL. TABLE S1, related to FIG. 1. **SILAC-based proteomic results.**

This table contains separate Excel sheets for proteins upregulated in 3D (i-iii) for hESCs (i), hiPSCs (ii) and hPSCs (iii, comprising a joint analysis of hESCs and hiPSCs) as well as for proteins downregulated in 3D (iv-vi) for hESCs (iv), hiPSCs (v) and hPSCs (vi). “Protein Names”, “Gene Names”, “Uniprot”, “Peptides”, “Sequence Coverage [%]”, “Mol. Weight [kDa]”, and “PEP” are direct output data of MaxQuant. “Gene Names” were searched at HGNC (HUGO Gene Nomenclature Committee, <http://www.genenames.org/>) in order to have a nomenclature comparable to transcriptomics data and are shown in row “HUGO Gene Names”. “Fold Change 2D/3D” represents the ratiometric mean of the respective protein amount under 2D conditions divided by the value under 3D culture conditions. This value was calculated from the three different biological repeats for hESCs and hiPSCs, each and for hPSCs, which is a joint analysis of hESCs and hiPSCs. Accordingly, the “Standard Deviation” and a “Student’s t-Test” were calculated.

SUPPL. TABLE S2, related to FIG. 1. **Deep-sequencing-based transcriptomic results.**

This table contains separate Excel sheets for transcripts upregulated in 3D (i-iii) for hESCs (i), hiPSCs (ii) and hPSCs (iii, comprising a joint analysis of hESCs and hiPSCs) as well as for transcripts downregulated in 3D (iv-vi) for hESCs (iv), hiPSCs (v) and hPSCs (vi). “id” depicts the nomenclature according to HGNC (HUGO Gene Nomenclature Committee, <http://www.genenames.org/>). “Base\_Mean\_2D” and “Base\_Mean\_3D” is a measure for the transcript amount in the sample. “Fold Change 3D/2D” is calculated as quotient of Base-Mean\_3D vs. Base\_Mean\_2D and “Fold Change 2D/3D” as quotient of Base-Mean\_2D vs. Base\_Mean\_3D. Genes for which no transcript was detected either under 3D or 2D conditions are written in italics and the respective “Fold Change” was set to “Inf”. The three biological replicates for each, hESCs and hiPSCs, were pooled, and the pools of hESCs and hiPSCs were analysed individually. Results are shown for hESCs, hiPSCs and for hPSCs,

which is a joint analysis of hESCs and hiPSCs. The “p-Value” rather reflects the technical significance of the analysis than the biological.

SUPPL. TABLE S3, related to FIG. 4 and 5. **Primers used for qPCR analyses.**

| Target gene name / full name                                               | Primer name | Primer sequence (5' to 3') |
|----------------------------------------------------------------------------|-------------|----------------------------|
| <b>Housekeeping genes</b>                                                  |             |                            |
| <i>ARPC1A</i> / actin related protein 2/3 subunit 1A                       | ARPC1A_fw   | GTGGAGCACGACTCATTCT        |
|                                                                            | ARPC1A_rev  | TGATCCTGCTGCCAGCAAAA       |
| <i>SDHB</i> / succinate dehydrogenase complex, subunit B, iron sulfur (lp) | SDHB_fw     | CTCCGAAGATCATGCAGAG        |
|                                                                            | SDHB_rev    | CATGTGTGGAAGAGGGTAGA       |
| <b>Pluripotency markers</b>                                                |             |                            |
| <i>OCT3/4 / POU5F1</i> / POU class 5 homeobox 1                            | OCT4_fw     | AGAAGGAGAAGCUGGAGCAA       |
|                                                                            | OCT4_rev    | CTCCCAAATAGAACCCCA         |
| <i>SOX2</i> / SRY (sex determining region Y)-box 2                         | SOX2_fw     | GGACTGCTGGAATCCT TCC       |
|                                                                            | SOX2_rev    | CTCGCTGATTAGGCTCCAACC      |
| <i>LIN28</i> / lin-28 homolog A                                            | LIN28_fw    | ATGGAGAAAACCCGGTACGC       |
|                                                                            | LIN28_rev   | TTTTGCGTGAGTGTGGATGG       |
| <i>NANOG</i> / Nanog homeobox                                              | NANOG_fw    | TTGAGGAGCAGGCAGAGTGG       |
|                                                                            | NANOG_rev   | TGCATTTGGACAGAGCATGG       |
| <i>PODXL</i> / podocalyxin-like                                            | PODXL_fw    | ACAGCAGCATCAACTACCCA       |
|                                                                            | PODXL_rev   | CTTCTCACTCTGTGTCTGTG       |
| <i>DNMT3B</i> / DNA (cytosine-5-)-methyltransferase 3 beta                 | DNMT3B_fw   | AAGTTTCTGCTGCTCACAGG       |
|                                                                            | DNMT3B_rev  | ATCGAGTTCGACTTGGTGGT       |
| <b>Wnt target genes</b>                                                    |             |                            |
| <i>CCND1</i> / Cyclin D1                                                   | CCND1_fw    | AATGTGTGCAGAAGGAGGTC       |
|                                                                            | CCND1_rev   | AAGCGGTCCAGGTAGTTCAT       |
| <i>c-MYC</i> / v-myc myelocytomatosis viral oncogene homolog               | c-MYC_fw    | CTTCTCTGAAAGGCTCTCCT       |
|                                                                            | c-MYC_rev   | GTCGTAGTCGAGGTCTAGT        |
| <i>ETV4 / PEA3</i> / ets variant 4                                         | ETV4_fw     | ATGAGAAACCTCTGCGACCA       |
|                                                                            | ETV4_rev    | CAGCAAGGCCACCAGAAATT       |
| <i>SLUG</i> / Snail homolog 2                                              | SLUG_fw     | ACTACAGCGAACTGGACACA       |
|                                                                            | SLUG_rev    | GAAAGAGGAGAGAGGCCATT       |
| <i>CD44</i> / CD44 antigen, Epican                                         | CD44 fw     | TGGGTTTCATAGAAGGGCATG      |
|                                                                            | CD44 rev    | ATTGGGCAGGTCTGTGACT        |
| <i>FOSL1</i> / FOS-like antigen 1                                          | FOSL1 fw    | AACTGACCGACTTCCTGCA        |
|                                                                            | FOSL1 rev   | CACTGGTACTGCCTGTGTC        |
| <i>L1CAM</i> / L1 cell adhesion molecule                                   | L1CAM fw 1  | TATGGCCTTGTCTGGGATCT       |
|                                                                            | L1CAM rev 1 | TAGGAGCTCTGGTTGTAGCT       |
| <i>PLAUR</i> / plasminogen activator, urokinase receptor                   | PLAUR fw 1  | GCATGCAGTGTAAGACCAAC       |
|                                                                            | PLAUR rev 1 | TCTCTGAGTGGGTACAGCTT       |
| <b>Wnt antagonists</b>                                                     |             |                            |
| <i>CER1</i> / cerberus 1, cysteine knot superfamily, homolog               | CER1_fw     | GAAGTACATTGGGAGACCTG       |
|                                                                            | CER1_rev    | ACAGTGAGAGCAGGAGGTAT       |
| <i>DKK1</i> / dickkopf 1 homolog                                           | DKK1_fw     | GTACCAGACCATTGACAAC        |
|                                                                            | DKK1_rev    | TGCAGGCGAGACAGATTTG        |
| <i>DKK4</i> / dickkopf homolog 4                                           | DKK4_fw     | AACATCAGGAGCTCTGCTGA       |
|                                                                            | DKK4_rev    | CACGACATGTAGCACAGAAC       |
| <i>FRZB</i> / Frizzled-related protein B                                   | FRZB_fw     | GAAGATGAGGAACGTTCCAG       |
|                                                                            | FRZB_rev    | GACTTCTGACTCTGAGTGG        |
| <i>SFRP1</i> / Secreted frizzled-related protein 1                         | SFRP1_fw    | TACTGGCCCCGAGATGCTTAA      |
|                                                                            | SFRP1_rev   | AAACTCGCTGGCACAGAGAT       |
| <i>WIF1</i> / WNT inhibitory factor 1                                      | WIF1_fw     | AAAGGTTACCAGGGAGACCT       |
|                                                                            | WIF1_rev    | TGTATGAGGCTGGCTTCGTA       |
| <b>Adherens junction</b>                                                   |             |                            |
| <i>CDH1</i> / Cadherin-1 / E-cadherin                                      | CDH1_fw     | GGAGCCAGACACATTTATGG       |
|                                                                            | CDH1_rev    | CTGTGTACGTGCTGTTCTTC       |
| <i>CTNNB1</i> / $\beta$ -catenin                                           | CTNNB1_fw   | CTGCTAAATGACGAGGACCA       |
|                                                                            | CTNNB1_rev  | GTATTCTGCATGGTACGTAC       |

SUPPL. TABLE S4, related to Fig. 4 and 5. **Primary antibodies used for western blots, flow cytometry and immunofluorescence.**

| Target                                                                             | Host species (isotype)     | Supplier                     | Supplier # | Clone     | Immunogen / Epitope *                                                                                                                                                                                                                                              |
|------------------------------------------------------------------------------------|----------------------------|------------------------------|------------|-----------|--------------------------------------------------------------------------------------------------------------------------------------------------------------------------------------------------------------------------------------------------------------------|
| <b>Pluripotency markers</b>                                                        |                            |                              |            |           |                                                                                                                                                                                                                                                                    |
| OCT3/4 / Octamer-binding protein 3/4 / POU domain, class 5, transcription factor 1 | mouse (IgG <sub>2b</sub> ) | Santa Cruz Biotechnology     | sc-5279    | C-10      | Raised against amino acids 1 - 134                                                                                                                                                                                                                                 |
| SSEA-4 Stage-specific embryonic antigen-4                                          | mouse (IgG <sub>3κ</sub> ) | BioLegend                    | 330401     | MC-813-70 | Detects a glycolipid: NeuAcα2-3Galβ1-3GalNacβ1-R                                                                                                                                                                                                                   |
| <b>E-Cadherin</b>                                                                  |                            |                              |            |           |                                                                                                                                                                                                                                                                    |
| CDH1 / Cadherin-1 / E-Cadherin                                                     | rabbit                     | Cell Signaling Technologies  | 3195S      | 24E10     | Raised against peptide around amino acid 780; the epitope is located C-terminal of amino acid 752, it contains at least amino acids 782 – 787 and ends C-terminal of amino acid 788 (personal communication with technical staff from Cell Signaling Technologies) |
|                                                                                    | mouse (IgG <sub>2a</sub> ) | BD Transduction Laboratories | C20820     | C-36      | Raised against C-terminal recombinant E-cadherin (cytosolic part); epitope: amino acids 773 – 791 (1)                                                                                                                                                              |
|                                                                                    | goat                       | Santa Cruz Biotechnology     | sc-1499    | C-19      | Raised against peptide within a C-terminal cytoplasmic domain; epitope: amino acids 863 – 882 (2)                                                                                                                                                                  |
| <b>β-Catenin</b>                                                                   |                            |                              |            |           |                                                                                                                                                                                                                                                                    |
| CTNNB1 / β-catenin                                                                 | rabbit                     | Cell Signaling Technologies  | 8480P      | D10A8     | Recognizes endogenous levels of total β-catenin protein; raised against peptide around amino acid 714                                                                                                                                                              |
|                                                                                    | rabbit                     | Millipore                    | ABE208     |           | Epitope is corresponding to the consensus GSK3 phosphorylation site of β-catenin; detects total levels of β-catenin                                                                                                                                                |
|                                                                                    | mouse (IgG <sub>1κ</sub> ) | Millipore                    | 05-665     | 8E7       | Epitope corresponds to amino acids 36 – 44 and is specific for the active form of β-catenin, dephosphorylated on Ser37 or Thr41                                                                                                                                    |
| <b>Other</b>                                                                       |                            |                              |            |           |                                                                                                                                                                                                                                                                    |
| SFRP1 / Secreted frizzled-related protein 1                                        | rabbit                     | Cell Signaling Technologies  | 3534S      | D5A7      | Detects endogenous levels of total SFRP1 protein                                                                                                                                                                                                                   |
| SPTAN1 / Spectrin alpha chain                                                      | mouse (IgG <sub>1</sub> )  | Millipore, Chemicon          | MAB1622    | AA6       | Immunogen: Chicken red blood cell membranes purified by hypotonic lysis and mechanical enucleation                                                                                                                                                                 |
| PSA (polysialic acid)                                                              | mouse                      |                              |            | 735D4     | Immunogen: polysialic acid                                                                                                                                                                                                                                         |



|                                |                           |               |         |       |                                                                                                      |
|--------------------------------|---------------------------|---------------|---------|-------|------------------------------------------------------------------------------------------------------|
|                                | (IgG <sub>2a</sub> )      |               |         |       |                                                                                                      |
| NCAM                           | mouse (IgG <sub>1</sub> ) |               |         | 123C3 | Immunogen: all isoforms of human NCAM                                                                |
| Islet-1                        | rabbit                    | Abcam         | ab20670 |       | Raised against peptide conjugated to KLH from within residues 300 to the C-terminus of human Islet-1 |
| $\alpha$ -actinin (sarcomeric) | mouse (IgG <sub>1</sub> ) | Sigma-Aldrich | A7811   | EA-53 | Raised against purified rabbit skeletal muscle $\alpha$ -actinin                                     |

\* Numbers refer to amino acid positions of the respective human protein, if not stated otherwise; information was obtained from supplier's data sheets, if not stated otherwise

SUPPL. TABLE S5, related to Fig. 4 and 5. **Secondary antibodies used for western blots, flow cytometry and immunofluorescence.**

| Target species (isotype)     | Host species | Supplier                             | Supplier #  | Fluorochrome                 | Application                               |
|------------------------------|--------------|--------------------------------------|-------------|------------------------------|-------------------------------------------|
| goat IgG (H+L)               | donkey       | LiCor                                | 926-32214   | IRDye 800CW                  | Western blot (against CDH1 (C19))         |
| anti-mouse IgG               | goat         | LiCor                                | 926-32220   | IRDye 680                    | Western blot                              |
| anti-mouse IgG               | goat         | LiCor                                | 926-32210   | IRDye 800CW                  | Western blot                              |
| anti-rabbit IgG              | goat         | LiCor                                | 926-32221   | IRDye 680                    | Western blot                              |
| anti-mouse IgG (H+L)         | goat         | Molecular Probes                     | A 11029     | Alexa Fluor <sup>®</sup> 488 | Flow cytometry (against SSEA-4)           |
| anti-mouse IgG <sub>2a</sub> | goat         | Molecular Probes                     | A 21134     | Alexa Fluor <sup>®</sup> 568 | Immunofluorescence (against anti-PSA)     |
| anti-mouse IgG <sub>2b</sub> | goat         | Molecular Probes                     | A 21141     | Alexa Fluor <sup>®</sup> 488 | Immunofluorescence (against anti-OCT3/4)  |
| anti-mouse IgG <sub>1</sub>  | goat         | Molecular Probes                     | A 21121     | Alexa Fluor <sup>®</sup> 488 | Immunofluorescence (against anti-NCAM)    |
| anti-mouse IgG (H+L)         | goat         | Jackson Immuno Research Laboratories | 115-165-003 | Cy <sup>™</sup> 3            | Immunofluorescence (against anti-SSEA-4)  |
| anti-rabbit IgG (H+L)        | donkey       | Molecular Probes                     | A21206      | Alexa Fluor <sup>®</sup> 488 | Immunofluorescence (against anti-Islet-1) |

## SUPPLEMENTAL RESULTS

*Genes with increased expression in suspension culture spheroids encode nuclear factors* — STRING database-based enrichment analyses performed with proteins and transcripts upregulated ( $p < 0.05$ ,  $> 1.5$ -fold) under 3D culture conditions in hPSCs (combined analysis of hESCs and hiPSCs) revealed that 29 transcripts matching to the KEGG pathway “systemic lupus erythematosus” were found to be enriched with high significance ( $p = 6 \times 10^{-13}$ ). All 29 matches were histone genes (Supplementary Table S2) and belong to the nucleosome. Gene ontology (GO)-enrichment analyses for “cellular component” and “biological process” confirmed the enrichment of transcripts upregulated in suspension culture to belong to the nucleosome or to be involved in chromatin assembly. With the exception of the core histone macro-H2A other histone proteins were not identified in the proteomic approach, because histones are generally smaller than 25 kDa, which was the lower size limit in the proteomic screen (Fig. 1B). Performing a search with the list of upregulated proteins for enrichment in “GO biological process” applying the STRING database, we identified categories like “telomere maintenance via semi-conservative replication”, “telomere maintenance via recombination” or “chromosome organization” as the most significant hits. The nucleosome assembly protein 1-like 1 (NAP1L1) was found to be the most highly upregulated protein in the SILAC proteomic experiment. Other replication associated proteins including the endonuclease III-like protein 1 (NTH1), the core histone macro-H2A (H2AFY2), the DNA polymerase epsilon subunit A (POLE1) or the DNA polymerase delta subunit A were also among the highly upregulated proteins in 3D culture (Supplementary Table S1).

## SUPPLEMENTAL DISCUSSION

Histone mRNAs are cell cycle-regulated and increase considerably when cells enter the S phase of the cell cycle where the chromosomal replication takes place. The histones are required in the S phase for packaging the newly synthesized DNA into chromatin. At the end of the S phase, before entering mitosis, histone expression drops to baseline levels (3). Pluripotent stem cells divide rapidly and have a considerably shortened G1 phase of the cell

cycle compared to somatic cells (4). Our finding of 3D induced upregulation of histone genes suggests that under 3D culture conditions more cells are in the S phase, which is indicative of higher proliferation rates and accelerated progression through the G1 phase. Calpains have been implicated in regulation of cell proliferation as calpain inhibitors have anti-mitogenic effects (5) and calpain activation shortens the G1 phase of transformed cells (6). Upregulation of the endogenous calpain inhibitor calpastatin as observed by us in 2D vs. 3D has been shown to decrease growth of CHO cells (7). We thus hypothesize that the observed activation of calpain might result in an increased proliferation of 3D cultured cells.

## Reference List

1. Chitaev, N. A., and Troyanovsky, S. M. (1998) Adhesive but not lateral E-cadherin complexes require calcium and catenins for their formation. *J. Cell Biol.* 142, 837-846
2. Rios-Doria, J., Day, K. C., Kuefer, R., Rashid, M. G., Chinnaiyan, A. M., Rubin, M. A., and Day, M. L. (2003) The role of calpain in the proteolytic cleavage of E-cadherin in prostate and mammary epithelial cells. *J. Biol. Chem.* 278, 1372-1379
3. Marzluff, W. F., and Duronio, R. J. (2002) Histone mRNA expression: multiple levels of cell cycle regulation and important developmental consequences. *Curr. Opin. Cell Biol.* 14, 692-699
4. Becker, K. A., Ghule, P. N., Therrien, J. A., Lian, J. B., Stein, J. L., van Wijnen, A. J., and Stein, G. S. (2006) Self-renewal of human embryonic stem cells is supported by a shortened G1 cell cycle phase. *J. Cell Physiol* 209, 883-893
5. Goll, D. E., Thompson, V. F., Li, H., Wei, W., and Cong, J. (2003) The calpain system. *Physiol Rev.* 83, 731-801
6. Frame, M. C., Fincham, V. J., Carragher, N. O., and Wyke, J. A. (2002) v-Src's hold over actin and cell adhesions. *Nat. Rev. Mol. Cell Biol.* 3, 233-245
7. Xu, Y., and Mellgren, R. L. (2002) Calpain inhibition decreases the growth rate of mammalian cell colonies. *J. Biol. Chem.* 277, 21474-21479
